# Supplementary material for: Dual-sgRNA CRISPR/Cas9 knockout of PD-L1 in human U87 glioblastoma tumor cells inhibits proliferation, invasion, and tumor-associated macrophage polarization
Source: PubMed Central journal article supplement (PMC8844083; doi:10.1038/s41598-022-06430-1), 2022-02-14

Ctl

g82/165 + HDR

0 days

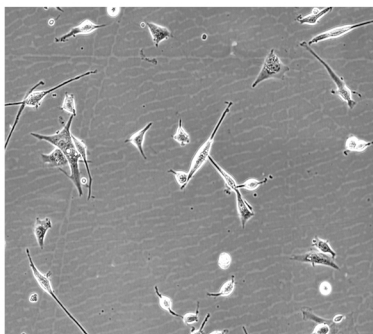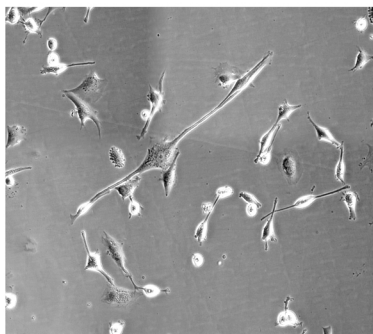

1

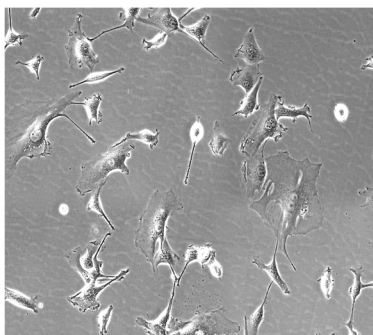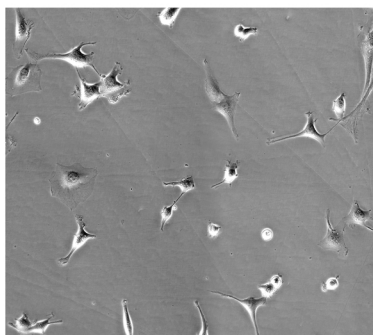

2

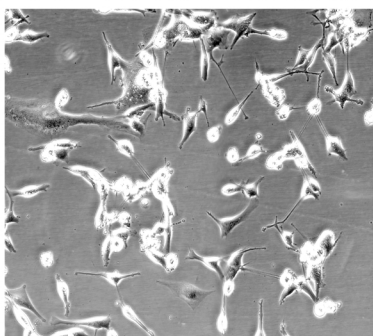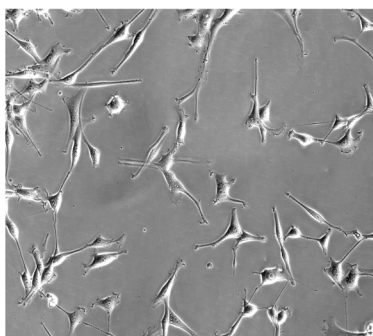

3

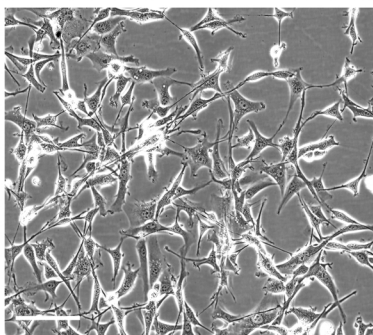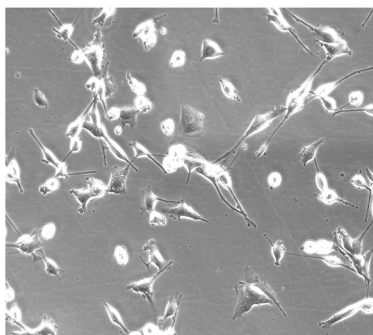

Supplement: 41598_2022_6430_MOESM9_ESM.pdf [file 41598_2022_6430_MOESM9_ESM.pdf]
